# Supplementary material
Source: MDPI journal article supplement (https://www.mdpi.com/1996-1073/12/23/4446)
Supplement: s1 [file s1]

# Supplementary Material

**Table S1.** List of policy documents investigated, according to document type and year of publication.

| Abbreviation      | Title                                                                                                                                                             | Year | Document Type                        |
|-------------------|-------------------------------------------------------------------------------------------------------------------------------------------------------------------|------|--------------------------------------|
| CAP_Ref1992       | COM(91)379: "Reform of the common agricultural policy"                                                                                                            | 1991 | EU Policy Directives and Legal Texts |
| WFD               | DIRECTIVE 2000/60/EC: "Establishing a framework for Community action in the field of water policy"                                                                | 2000 | EU Policy Directives and Legal Texts |
| RenEnDir          | DIRECTIVE 2009/28/EC: "On the promotion of the use of energy from renewable sources and amending and subsequently repealing Directives 2001/77/EC and 2003/30/EC" | 2009 | EU Policy Directives and Legal Texts |
| NitratesDir       | DIRECTIVE 91/676/EEC: "Concerning the protection of waters against pollution caused by nitrates from agricultural sources"                                        | 2010 | EU Policy Directives and Legal Texts |
| CAP_Markets       | REGULATION (EU) No 1308/2013: "Establishing a common organisation of the markets in agricultural products"                                                        | 2013 | EU Policy Directives and Legal Texts |
| CAP_Payments      | REGULATION (EU) No 1307/2013: "Establishing rules for direct payments to farmers under support schemes within the framework of the common agricultural policy"    | 2013 | EU Policy Directives and Legal Texts |
| CAP_RuralDev      | REGULATION (EU) No 1305/2013: "On support for rural development by the European Agricultural Fund for Rural Development (EAFRD)"                                  | 2013 | EU Policy Directives and Legal Texts |
| CAP_Ref1Ref1992   | COM(91) 100: "The Development and Future of the CAP"                                                                                                              | 1991 | EU Communications                    |
| WFD_DecMak        | COM(97) 49: "Establishing a framework for Community action in the field of water policy"                                                                          | 1997 | EU Communications                    |
| IndicIntegrEnvCAP | COM(2000) 20: "Indicators for the Integration of Environmental Concerns into the Common Agricultural Policy"                                                      | 2000 | EU Communications                    |
| SustResUse        | COM(2005) 670: "Thematic Strategy on the sustainable use of natural resources"                                                                                    | 2005 | EU Communications                    |
| ReviewEIA         | COM(2009) 378: "On the application and effectiveness of the EIA Directive"                                                                                        | 2009 | EU Communications                    |
| CAP_Tow2020       | COM(2010) 672: "The CAP towards 2020: Meeting the food, natural resources and territorial challenges of the future"                                               | 2010 | EU Communications                    |
| LowCarbEcon2050   | COM(2011) 112: "A Roadmap for moving to a competitive low carbon economy in 2050"                                                                                 | 2011 | EU Communications                    |
| ResEffEurope      | COM(2011) 571: "Roadmap to a Resource Efficient Europe"                                                                                                           | 2011 | EU Communications                    |
| En2020            | COM(2010) 639: "Energy 2020 – A strategy for competitive, sustainable and secure energy"                                                                          | 2011 | EU Communications                    |
| EnRoadmap2050     | COM(2011) 885: "Energy Roadmap 2050"                                                                                                                              | 2012 | EU Communications                    |
| EnSecStrat        | COM(2014) 330: "European Energy Security Strategy"                                                                                                                | 2014 | EU Communications                    |
| En2030EnEff       | COM(2014) 520: "Energy Efficiency and its contribution to energy security and the 2030 Framework for climate and energy policy"                                   | 2014 | EU Communications                    |
| En2030Strat       | COM(2014) 15: "A policy framework for climate and energy in the period from 2020 to 2030"                                                                         | 2014 | EU Communications                    |
| CAP_Agenda2000    | "CAP reform – A policy for the future"                                                                                                                            | 1999 | EU Policy Reports                    |
| CAP_FutEurope2000 | "Agenda 2000: The future for European agriculture"                                                                                                                | 2000 | EU Policy Reports                    |

|                   |                                                                                                                                    |      |                         |
|-------------------|------------------------------------------------------------------------------------------------------------------------------------|------|-------------------------|
| CAP_2003Reform    | "Towards sustainable farming a mid-term review of the common agricultural policy"                                                  | 2002 | EU Policy Reports       |
| LandPolGuide      | "EU land policy guidelines: Guidelines for support to land policy design and land policy reform processes in developing countries" | 2004 | EU Policy Reports       |
| WatScarcImpact    | "Addressing the challenge of water scarcity and droughts in the European Union: Impact Assessment"                                 | 2007 | EU Policy Reports       |
| WFD_IntegrWat     | "Water Note 9: Integrating water policy: Linking all EU water legislation within a single framework"                               | 2008 | EU Policy Reports       |
| En2050_AccDoc     | "State of play in the EU energy policy"                                                                                            | 2010 | EU Policy Reports       |
| NitrDir_Backgr    | "The EU Nitrates Directive"                                                                                                        | 2010 | EU Policy Reports       |
| WatScarcDroughts  | "Guidelines for support to land policy design and land policy reform processes in developing countries"                            | 2011 | EU Policy Reports       |
| CAP_2013RefOverv  | "Overview of CAP Reform 2014-2020"                                                                                                 | 2013 | EU Policy Reports       |
| CAP_10yrEnl       | "EU-10 and the CAP: 10 years of success"                                                                                           | 2014 | EU Policy Reports       |
| En2030_ImpAssAcc  | "Energy Efficiency and its contribution to energy security and the 2030 Framework for climate and energy policy"                   | 2014 | EU Policy Reports       |
| SoilWaterStudy    | "Study on soil and Water in a changing environment"                                                                                | 2014 | EU Policy Reports       |
| CAP_2003CrossComp | "The 2003 CAP reform and cross-compliance"                                                                                         | 2004 | Additional EU Documents |
| ConfrScarc        | "Confronting scarcity: Managing water, energy and land for inclusive and sustainable growth"                                       | 2012 | Additional EU Documents |
| EN2030Cons        | "Green Paper 2030 on a 2030 framework for climate and energy policies: Main outcomes of the public consultation"                   | 2013 | Additional EU Documents |
| IntegrClimBiodiv  | "Guidance on Integrating Climate Change and Biodiversity into Environmental Impact Assessment"                                     | 2013 | Additional EU Documents |
| ResEcEffWatDistr  | "Resource and Economic Efficiency of Water Distribution Networks in the EU"                                                        | 2013 | Additional EU Documents |
| WaterCapIntegr    | "Integration of EU water policy objectives with the CAP: a partial success"                                                        | 2014 | Additional EU Documents |
| WFD_Leaflet       | "The EU Water Framework Directive - Leaflet"                                                                                       | 2014 | Additional EU Documents |
| SustDevEU         | "Sustainable development in the European Union – a statistical glance from the viewpoint of the UN Sustainable Development Goals"  | 2016 | Additional EU Documents |

Source: own compilation.
